# Supplementary material
Source: ML conference proceedings conference paper supplement (https://openaccess.thecvf.com/content/CVPR2024/html/Liu_PI3D_Efficient_Text-to-3D_CVPR_2024_paper.html)
Supplement: Supplementary file 2 [file Liu_PI3D_Efficient_Text-to-3D_CVPR_2024_supplemental.zip]

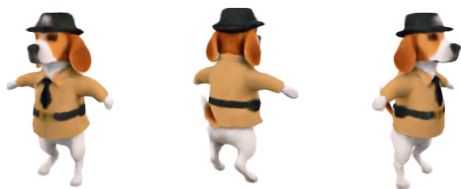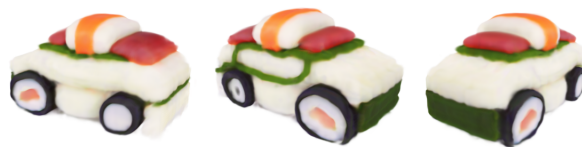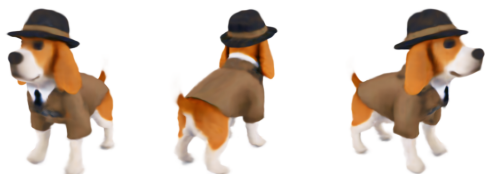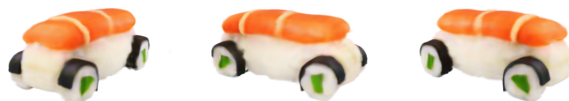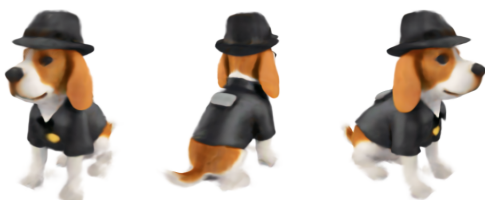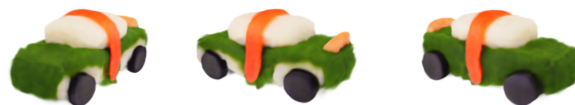

*a beagle in a detective's outfit*

*a car made out of sushi*

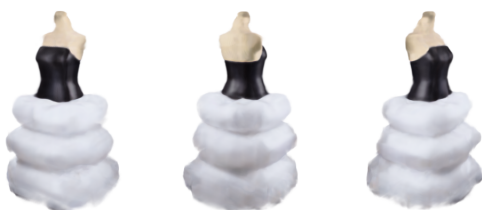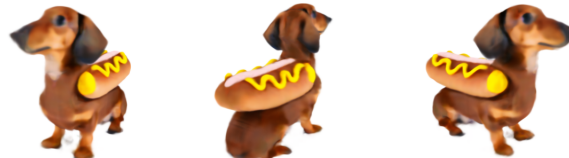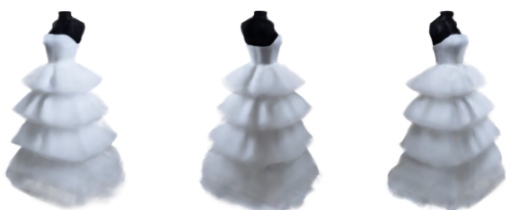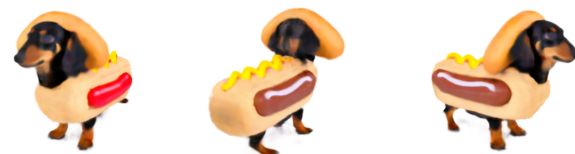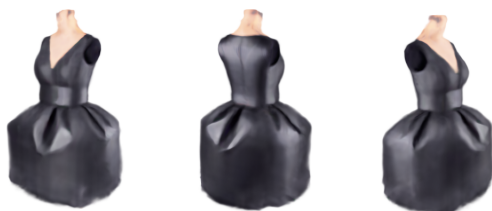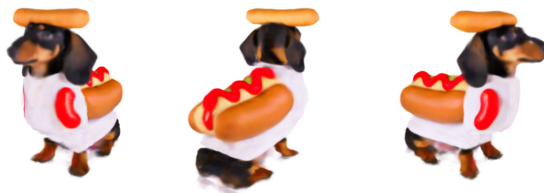

*a beautiful dress made out of garbage bags, on a mannequin*

*a dachshund dressed up in a hotdog costume*

Figure 10. We provide more generated results with diversity. We show 3 different outcomes for each text prompt.

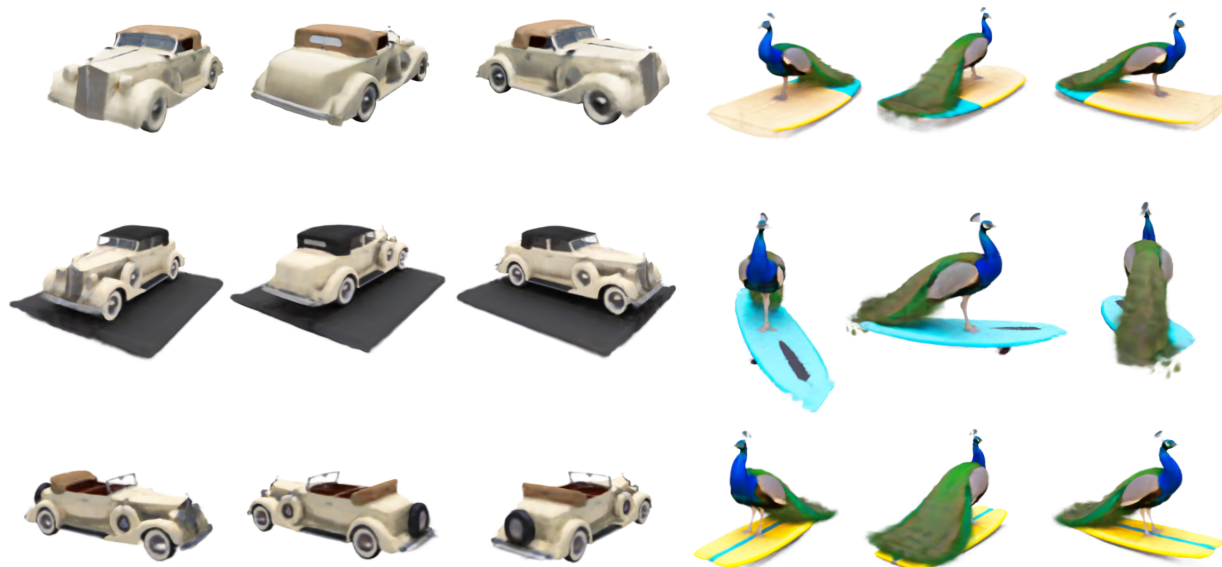

*a classic Packard car*

*a peacock on a surfboard*

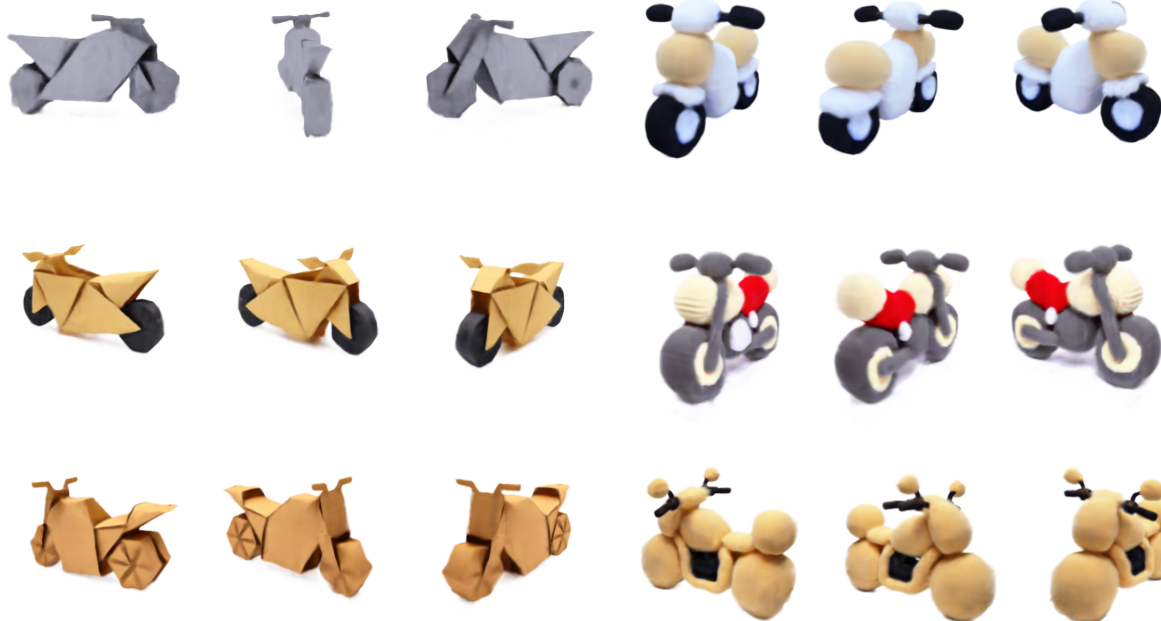

*an origami motorcycle*

*an amigurumi motorcycle*
